# Supplementary material for: Canopied trans-chelating bis(N-heterocyclic carbene) ligand: synthesis, structure and catalysis
Source: Royal Society of Chemistry journal article supplement (doi:10.1039/b815739a), 2009-01-01
Supplement: b815739a.pdf [file b815739a.pdf]

## Electronic Supplementary Information

### Canopied *trans*-chelating bis(*N*-heterocyclic carbene) ligand: synthesis, structure and catalysis

Brad P. Morgan, Gabriela A. Galdamez, Robert J. Gilliard, Jr. and Rhett C. Smith\*

Department of Chemistry and Center for Optical Materials Science and Engineering Technologies (COSMET), Clemson University, Clemson, SC 29634

Email: [rhett@clemson.edu](mailto:rhett@clemson.edu)

#### List of Supporting Information Figures:

- Figure S1.**  $^1\text{H}$  NMR spectrum of  $[\text{Ag}(\mathbf{1})]\text{AgBr}_2$  (DMSO, 300 MHz)  
**Figure S2.** Aromatic region of the  $^1\text{H}$  NMR spectrum of  $[\text{Ag}(\mathbf{1})]\text{AgBr}_2$  (DMSO, 300 MHz)  
**Figure S3.** Aliphatic region of the  $^1\text{H}$  NMR spectrum of  $[\text{Ag}(\mathbf{1})]\text{AgBr}_2$  (DMSO, 300 MHz)  
**Figure S4.**  $^1\text{H}$ - $^1\text{H}$  Correlated Spectrum (COSY) of  $[\text{Ag}(\mathbf{1})]\text{AgBr}_2$  (DMSO, 300 MHz)  
**Figure S5.** Nuclear Overhauser Effect Difference (NOE-DIFF) Spectrum of  $[\text{Ag}(\mathbf{1})]\text{AgBr}_2$  (DMSO, 300 MHz) for protons resonating at 5.43 ppm  
**Figure S6.** Nuclear Overhauser Effect Difference (NOE-DIFF) Spectrum of  $[\text{Ag}(\mathbf{1})]\text{AgBr}_2$  (DMSO, 300 MHz) for protons resonating at 3.96 ppm  
**Figure S7.** Carbon-13 NMR spectrum of  $[\text{Ag}(\mathbf{1})]\text{AgBr}_2$  (DMSO, 75 MHz)  
**Figure S8.** Aromatic region of the  $^{13}\text{C}$  NMR spectrum of  $[\text{Ag}(\mathbf{1})]\text{AgBr}_2$  (DMSO, 75 MHz)  
**Figure S9.** Heteronuclear Multiple Quantum Coherence (HMQC) spectrum of  $[\text{Ag}(\mathbf{1})]\text{AgBr}_2$  (300 MHz for  $^1\text{H}$ , 75 MHz for  $^{13}\text{C}$ , in DMSO)  
**Figure S10.** Distortionless Enhancement by Polarization Transfer (DEPT-135) spectrum of  $[\text{Ag}(\mathbf{1})]\text{AgBr}_2$  (DMSO, 75 MHz)  
**Figure S11.** Aromatic region of DEPT-135 spectrum of  $[\text{Ag}(\mathbf{1})]\text{AgBr}_2$  (DMSO, 75 MHz)  
**Figure S12.**  $^1\text{H}$  NMR spectrum of  $[\text{H}_2\mathbf{1}]\text{Br}_2$  (DMSO, 300 MHz)  
**Figure S13.** Aromatic region of the  $^1\text{H}$  NMR spectrum of  $[\text{H}_2\mathbf{1}]\text{Br}_2$  (DMSO, 300 MHz)  
**Figure S14.**  $^{13}\text{C}$  NMR spectrum of  $[\text{H}_2\mathbf{1}]\text{Br}_2$  ( $\text{CD}_3\text{CN}$ , 75 MHz)  
**Figure S15.** Aromatic region of the  $^{13}\text{C}$  NMR spectrum of  $[\text{H}_2\mathbf{1}]\text{Br}_2$  ( $\text{CD}_3\text{CN}$ , 75 MHz)  
**Figure S16.**  $^1\text{H}$  NMR spectrum of  $[\text{Cl}_2\text{Pd}(\mathbf{1})]$  ( $\text{CDCl}_3$ , 300 MHz)  
**Figure S17.** Aliphatic region of the  $^1\text{H}$  NMR spectrum of  $[\text{Cl}_2\text{Pd}(\mathbf{1})]$  ( $\text{CDCl}_3$ , 300 MHz)  
**Figure S18.** Aromatic region of the  $^1\text{H}$  NMR spectrum of  $[\text{Cl}_2\text{Pd}(\mathbf{1})]$  ( $\text{CDCl}_3$ , 300 MHz)  
**Figure S19.**  $^{13}\text{C}$  NMR spectrum of  $[\text{Cl}_2\text{Pd}(\mathbf{1})]$  ( $\text{CDCl}_3$ , 75 MHz)  
**Figure S20.** Aromatic region of the  $^{13}\text{C}$  NMR spectrum of  $[\text{Cl}_2\text{Pd}(\mathbf{1})]$  ( $\text{CDCl}_3$ , 75 MHz)  
**Figure S21.** ESI-MS of  $[\text{Cl}_2\text{Pd}(\mathbf{1})]$  with theoretical isotopic distributions for major peak sets

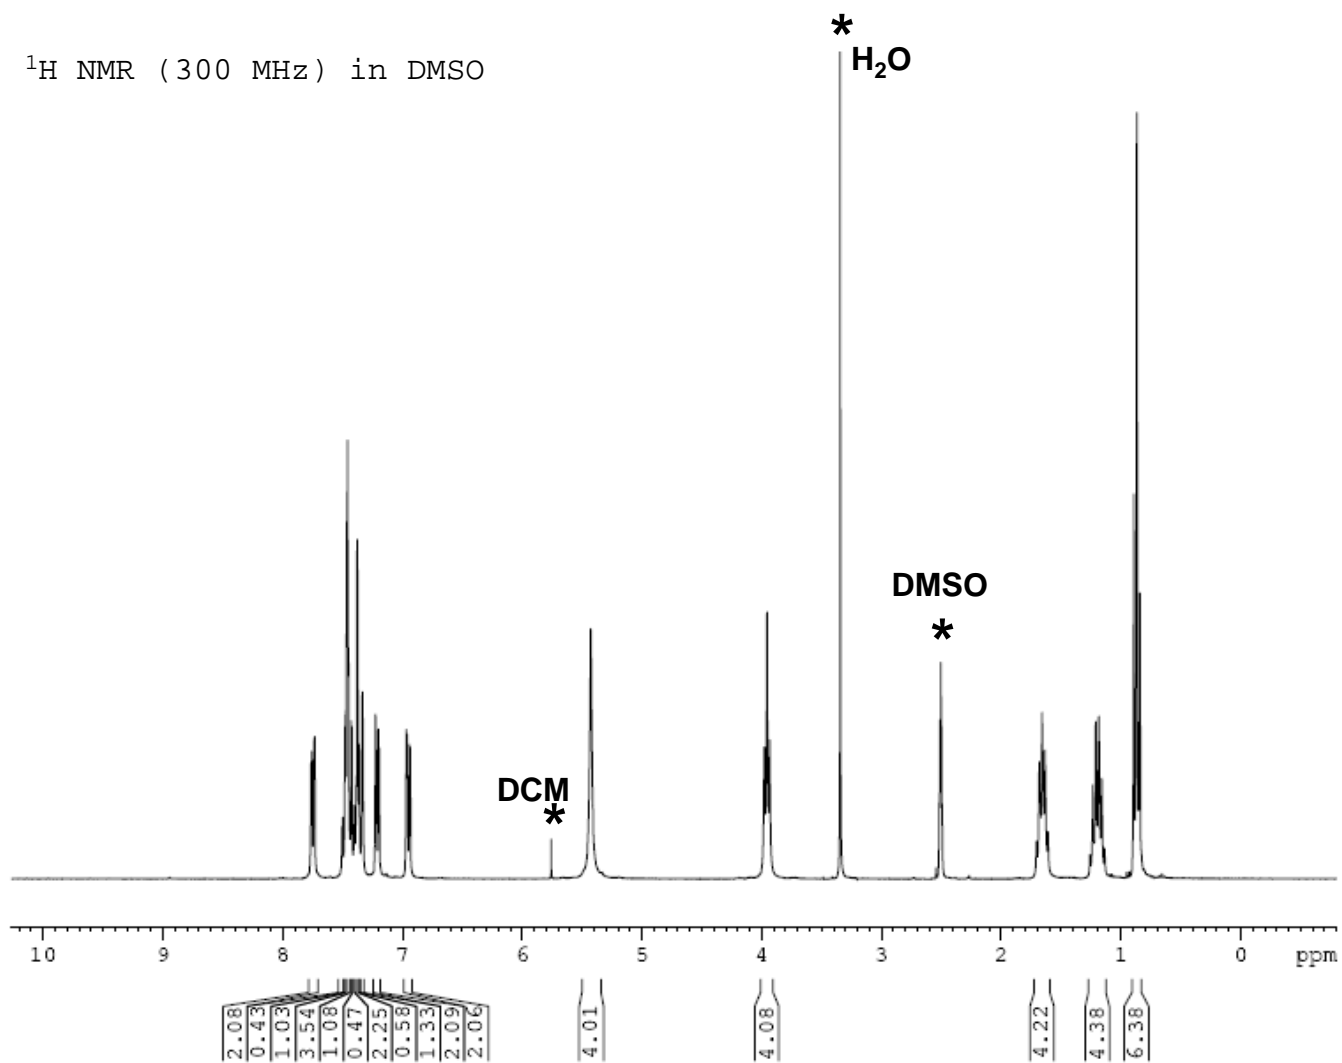

**Figure S1.** Proton NMR spectrum of  $[\text{Ag}(\mathbf{1})]\text{AgBr}_2$  (DMSO, 300 MHz)

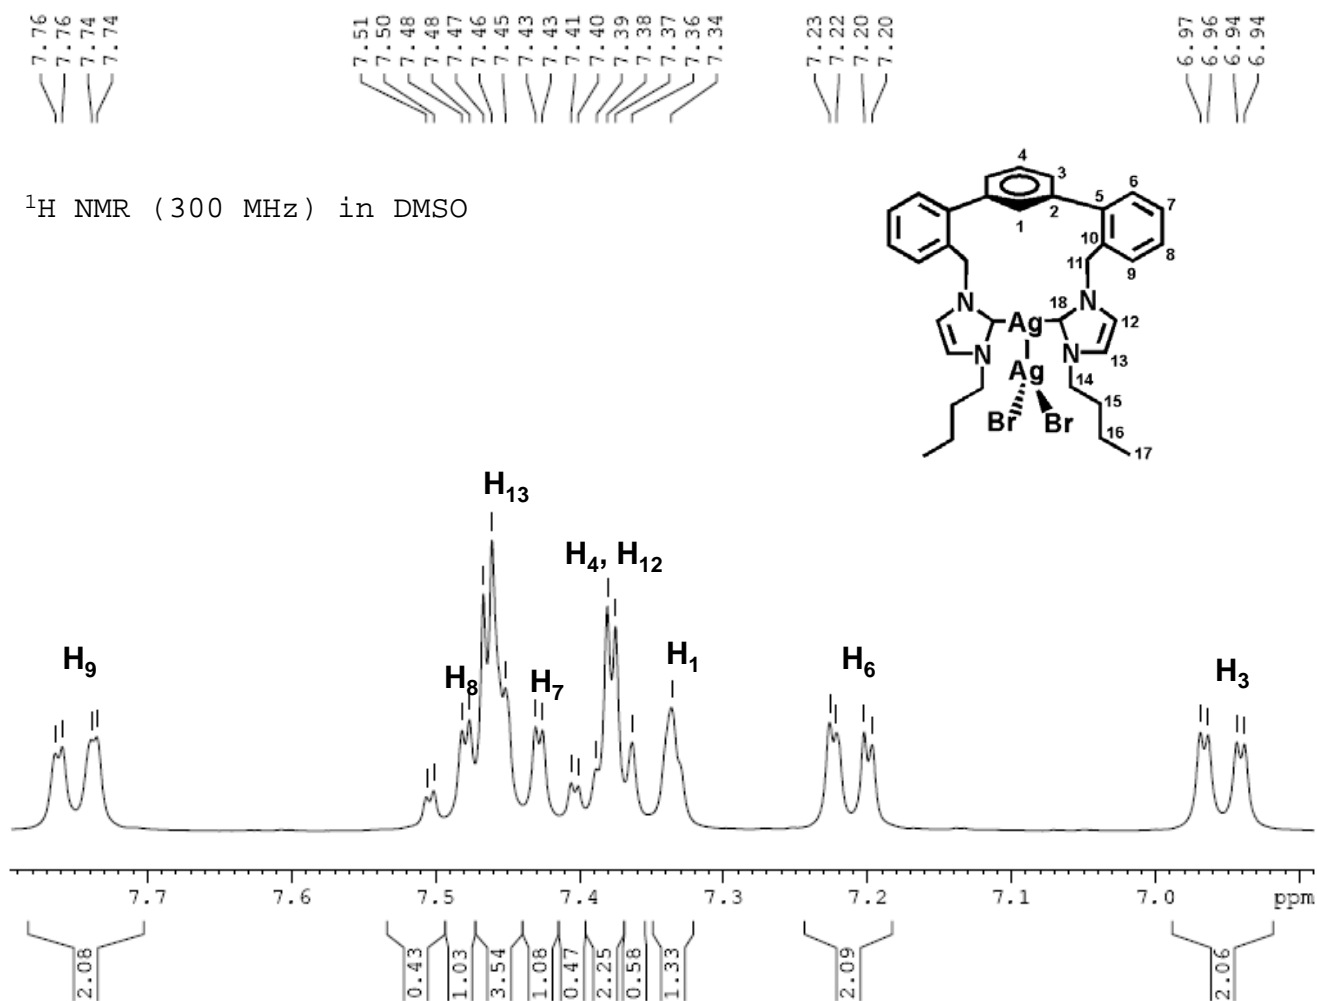

**Figure S2.** Aromatic Region of the <sup>1</sup>H NMR spectrum of [Ag(**1**)]AgBr<sub>2</sub> (DMSO , 300 MHz)

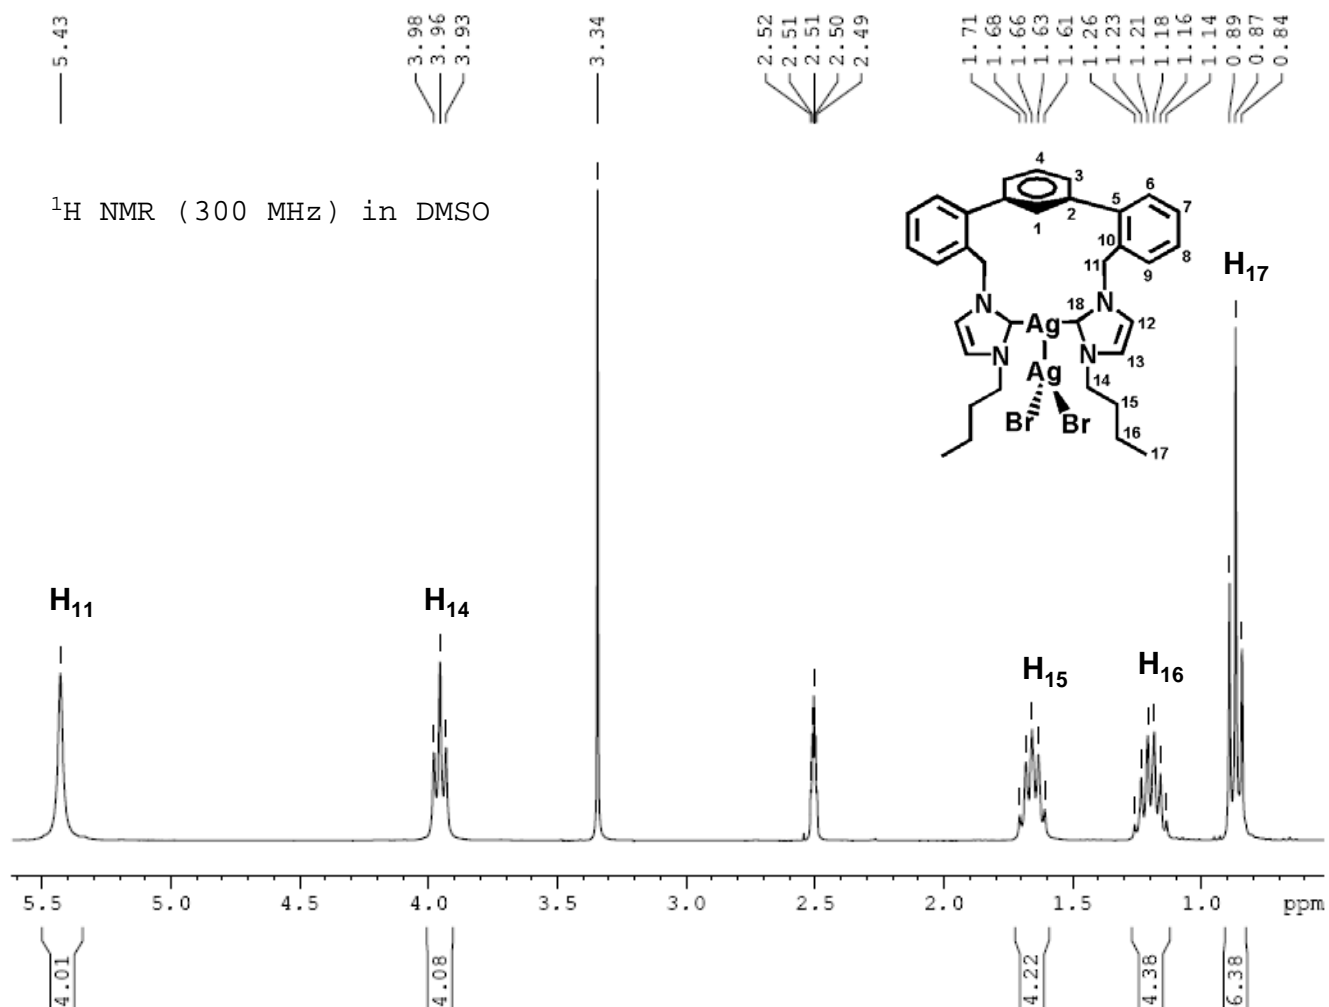

**Figure S3.** Aliphatic Region of the  $^1\text{H}$  NMR spectrum of  $[\text{Ag}(\mathbf{1})]\text{AgBr}_2$  (DMSO, 300 MHz)

$^1\text{H}$ - $^1\text{H}$  COSY (300 MHz) in DMSO

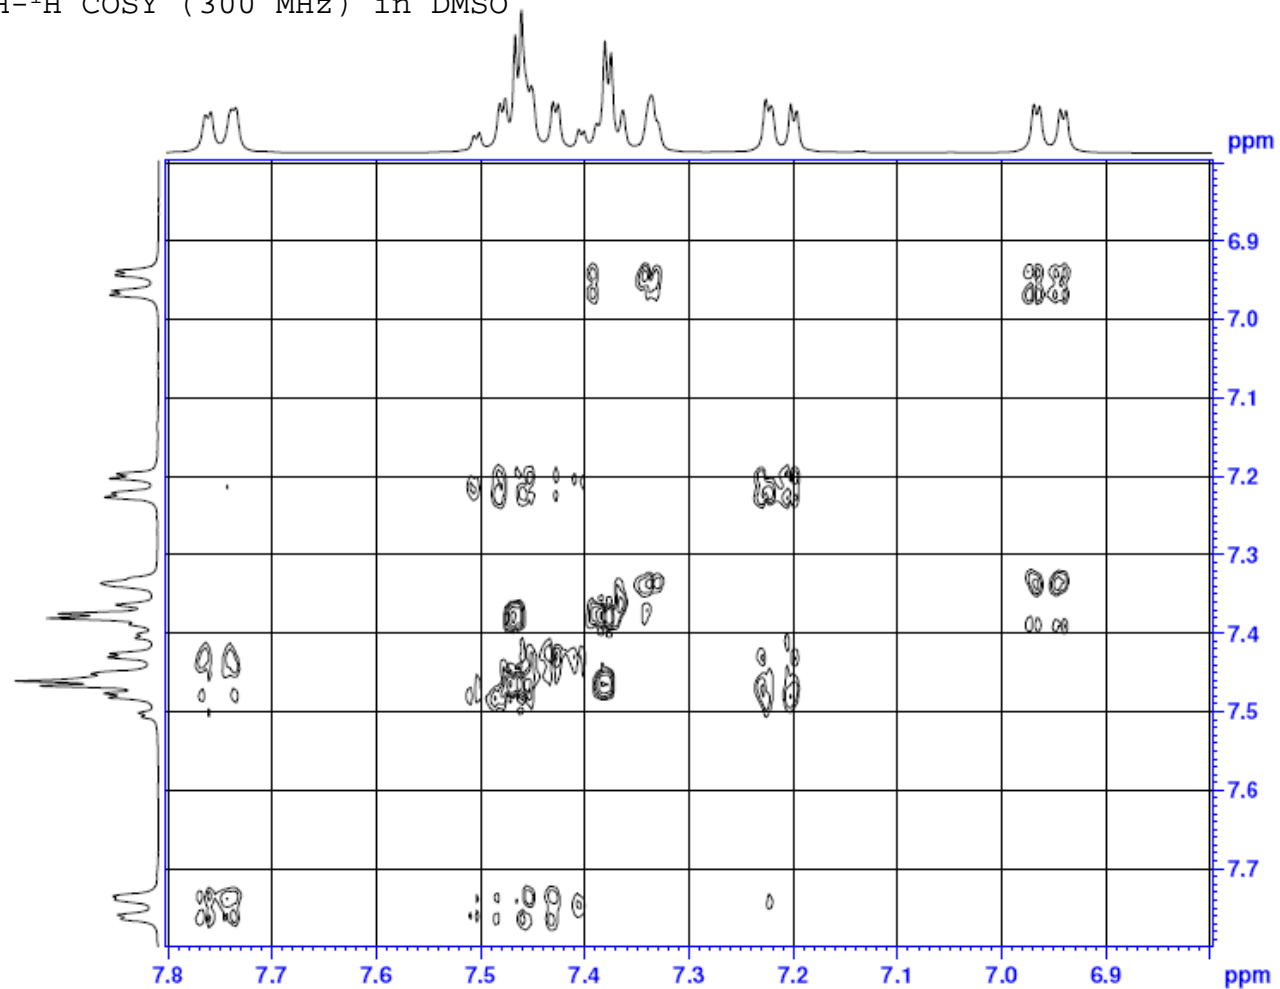

**Figure S4.**  $^1\text{H}$ - $^1\text{H}$  Correlated Spectrum (COSY) of  $[\text{Ag}(\mathbf{1})]\text{AgBr}_2$  (DMSO, 300 MHz)

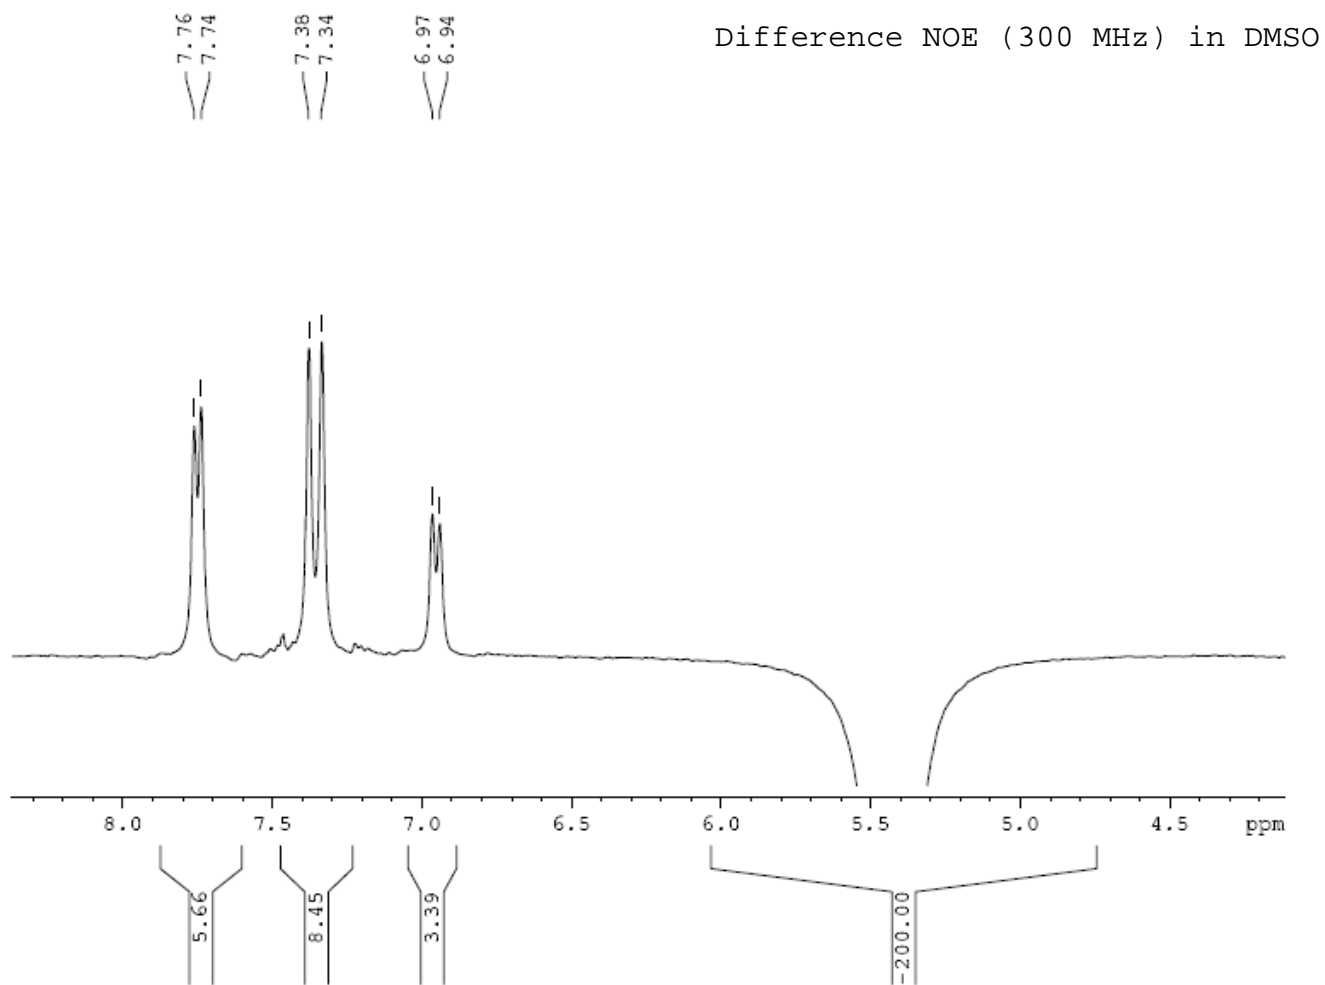

**Figure S5.** Nuclear Overhauser Effect Difference (NOE-DIFF) Spectrum of [Ag(**1**)]AgBr<sub>2</sub> (DMSO, 300 MHz) for protons resonating at 5.43 ppm

Difference NOE (300 MHz) in DMSO

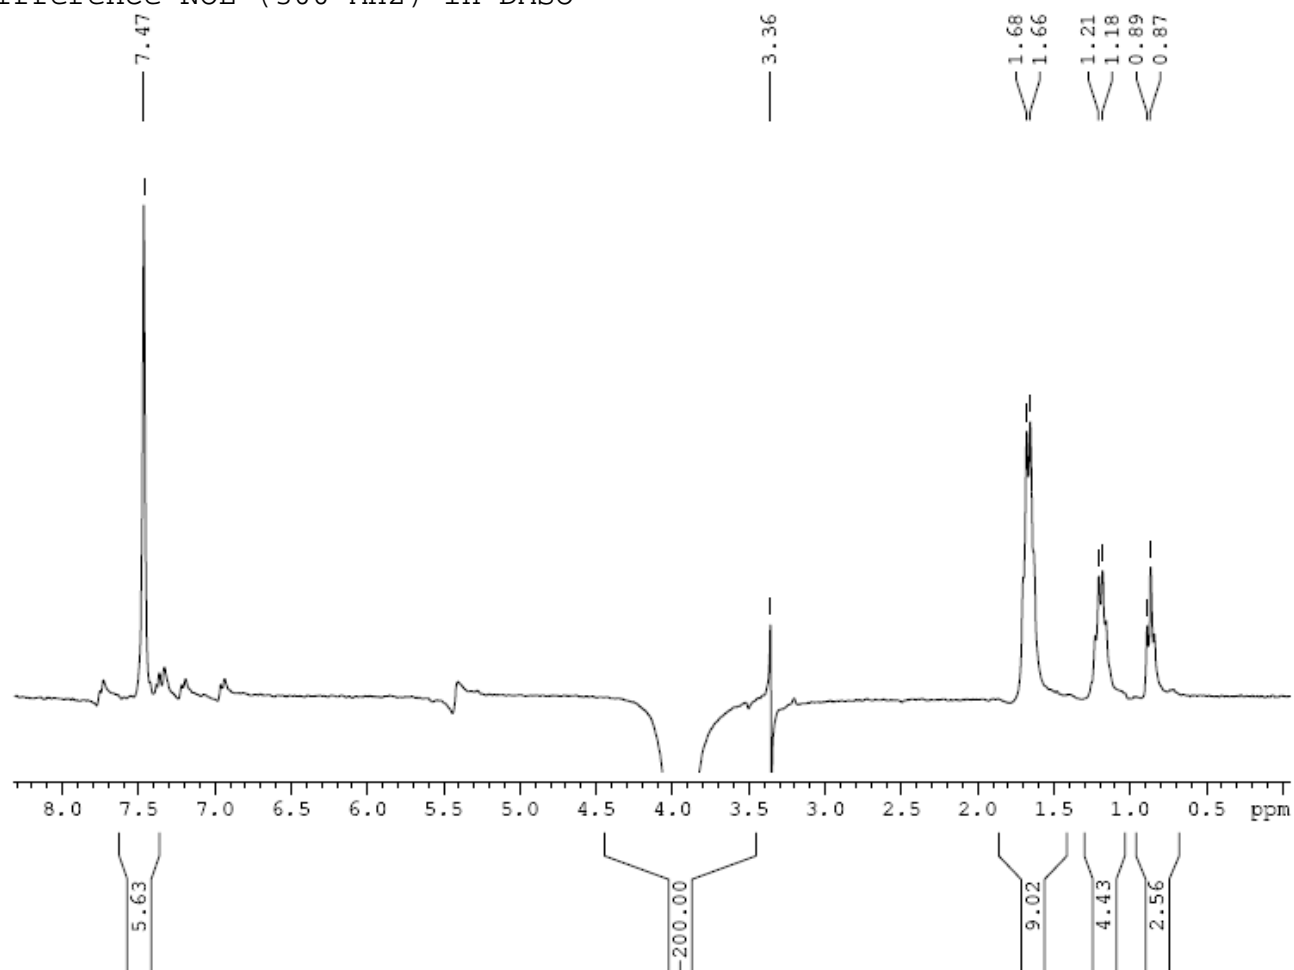

**Figure S6.** Nuclear Overhauser Effect Difference (NOE-DIFF) Spectrum of [Ag(**1**)]AgBr<sub>2</sub> (DMSO, 300 MHz) for protons resonating at 3.96 ppm

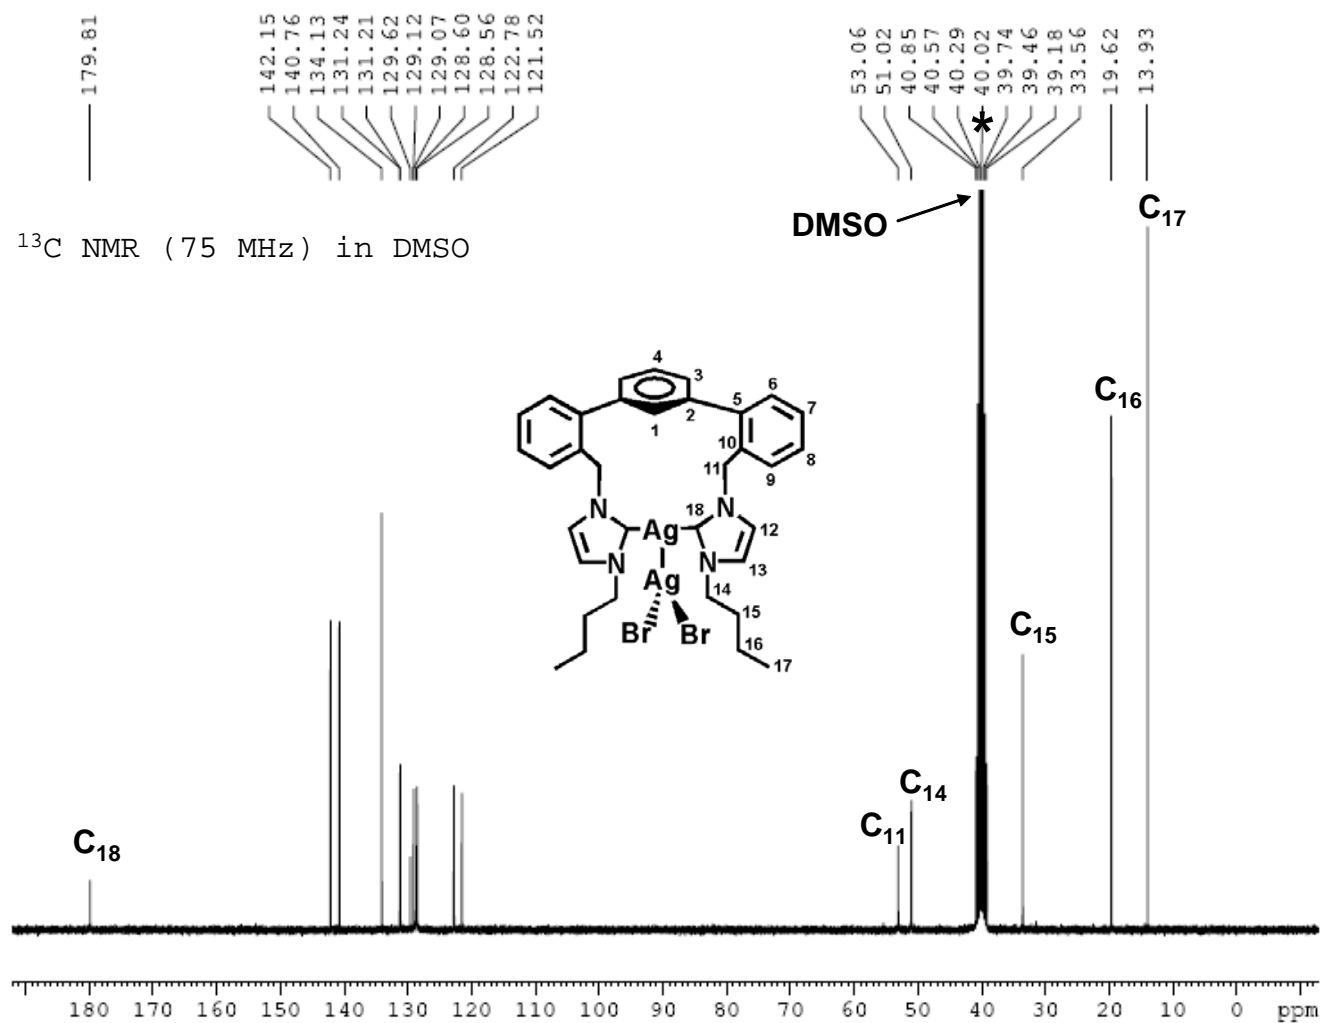

**Figure S7.** Carbon-13 NMR spectrum of  $[\text{Ag}(\mathbf{1})]\text{AgBr}_2$  (DMSO, 75 MHz)

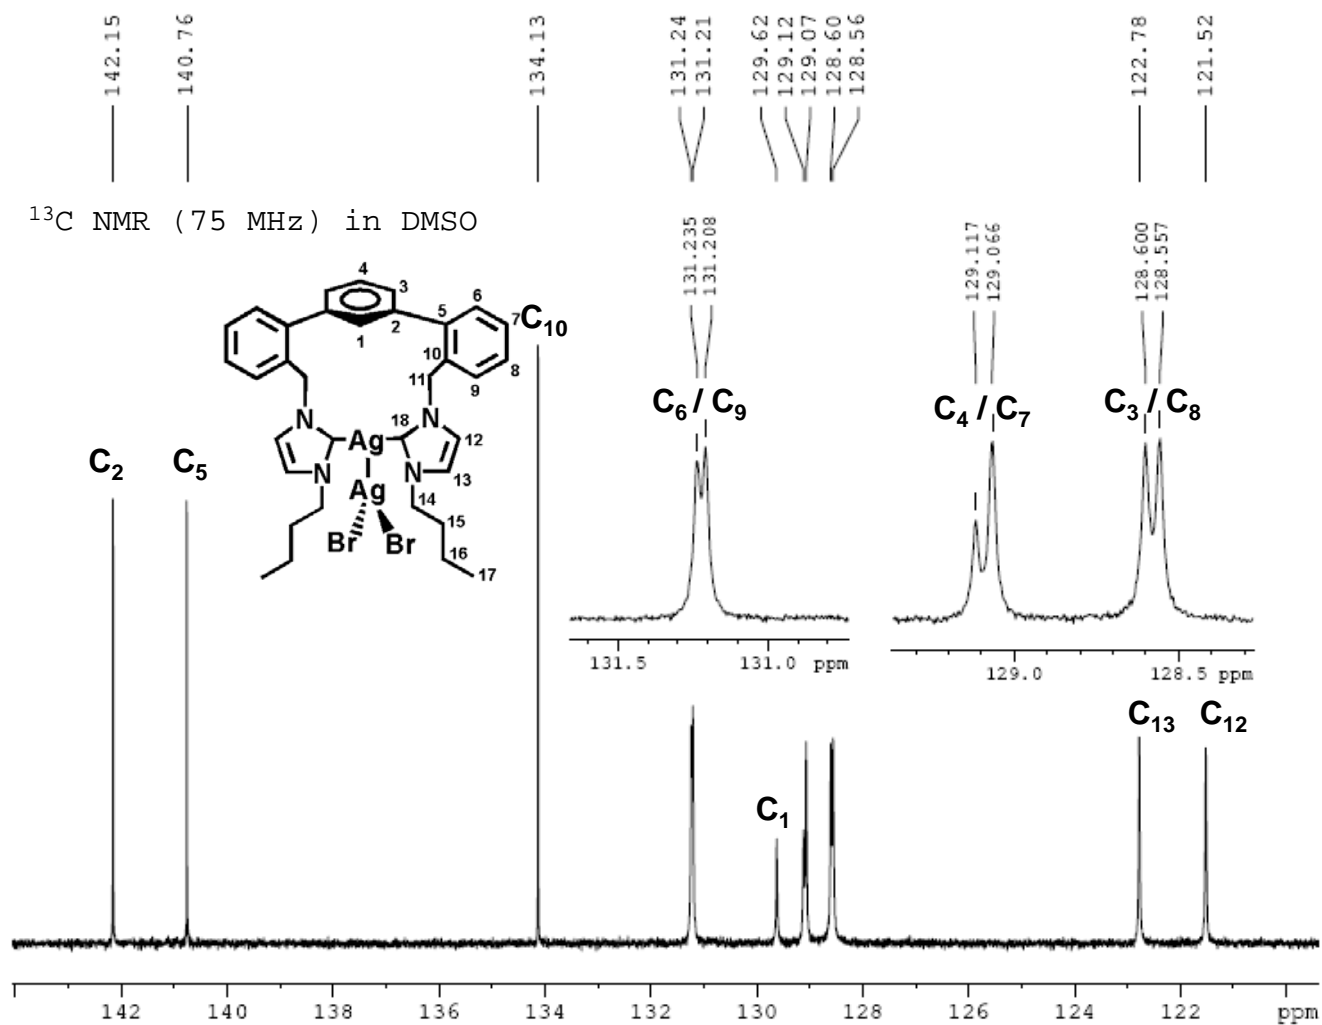

**Figure S8.** Aromatic region of the  $^{13}\text{C}$  NMR spectrum of  $[\text{Ag}(\mathbf{1})]\text{AgBr}_2$  (DMSO, 75 MHz)

HMQC ( $^1\text{H}$ , 300 MHz;  $^{13}\text{C}$ , 75 MHz) in DMSO

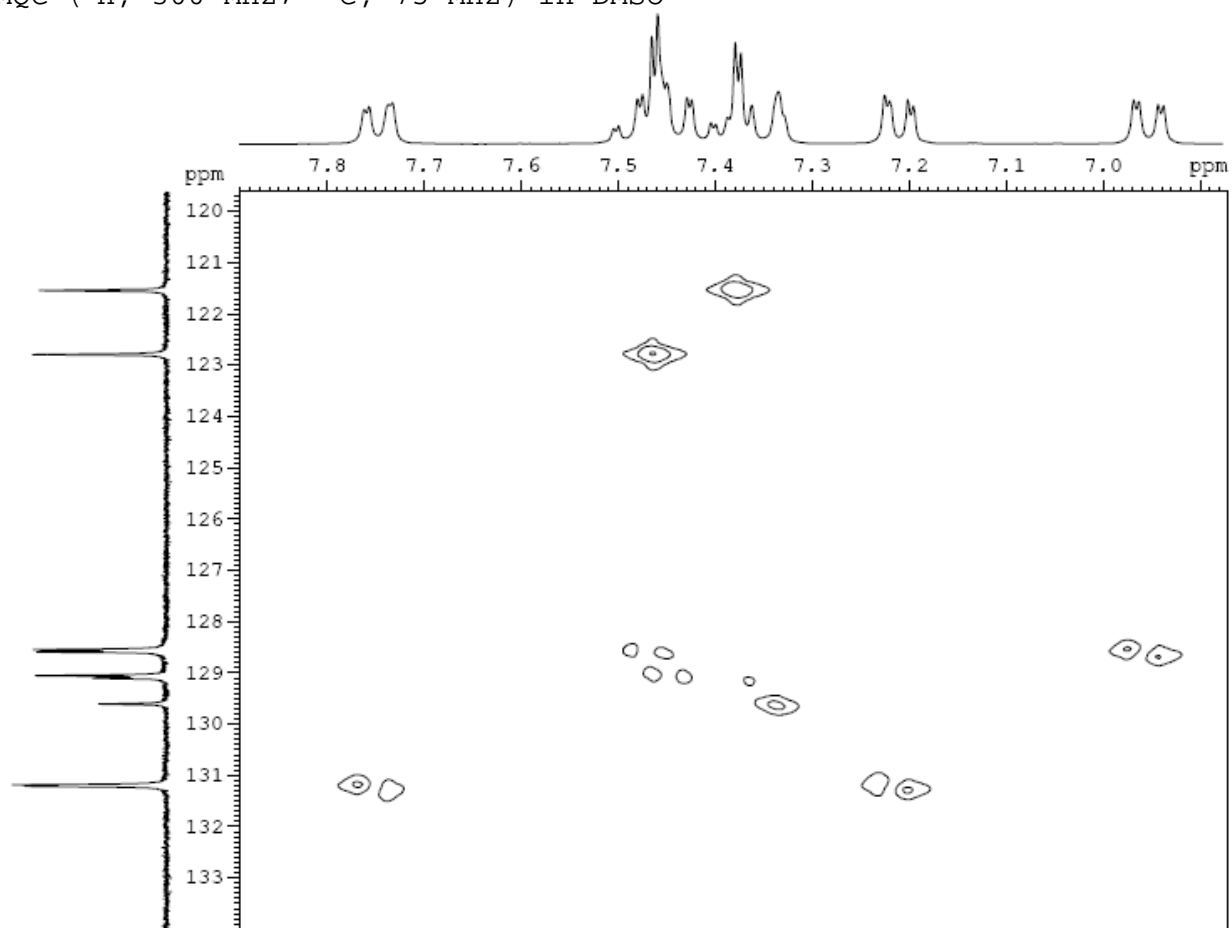

**Figure S9.** Heteronuclear Multiple Quantum Coherence (HMQC) spectrum of  $[\text{Ag}(\mathbf{1})]\text{AgBr}_2$  (300 MHz for  $^1\text{H}$ , 75 MHz for  $^{13}\text{C}$ , in DMSO)

DEPT-135 (75 MHz) in DMSO

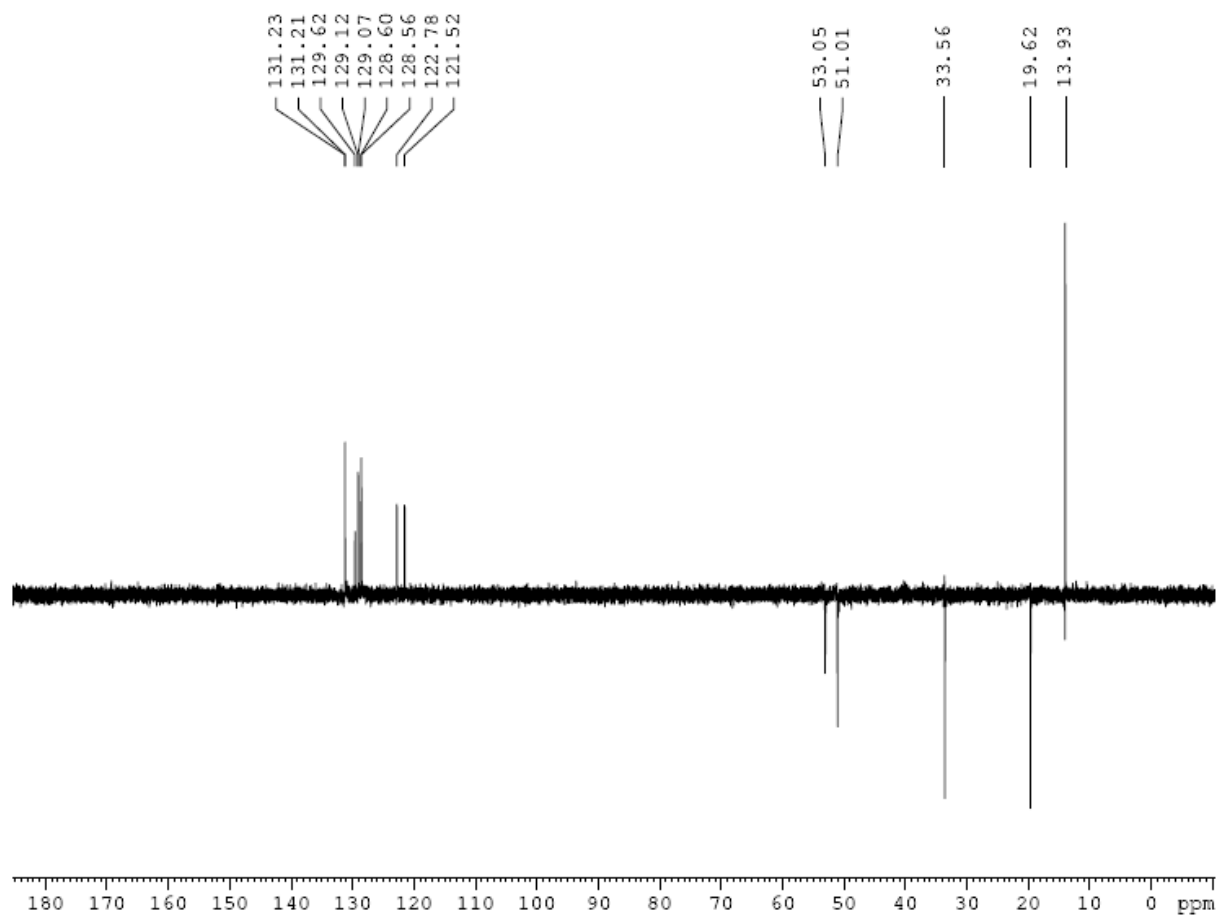

**Figure S10.** Distortionless Enhancement by Polarization Transfer (DEPT-135) spectrum of [Ag(1)]AgBr<sub>2</sub> (DMSO, 75 MHz)

DEPT-135 (75 MHz) in DMSO

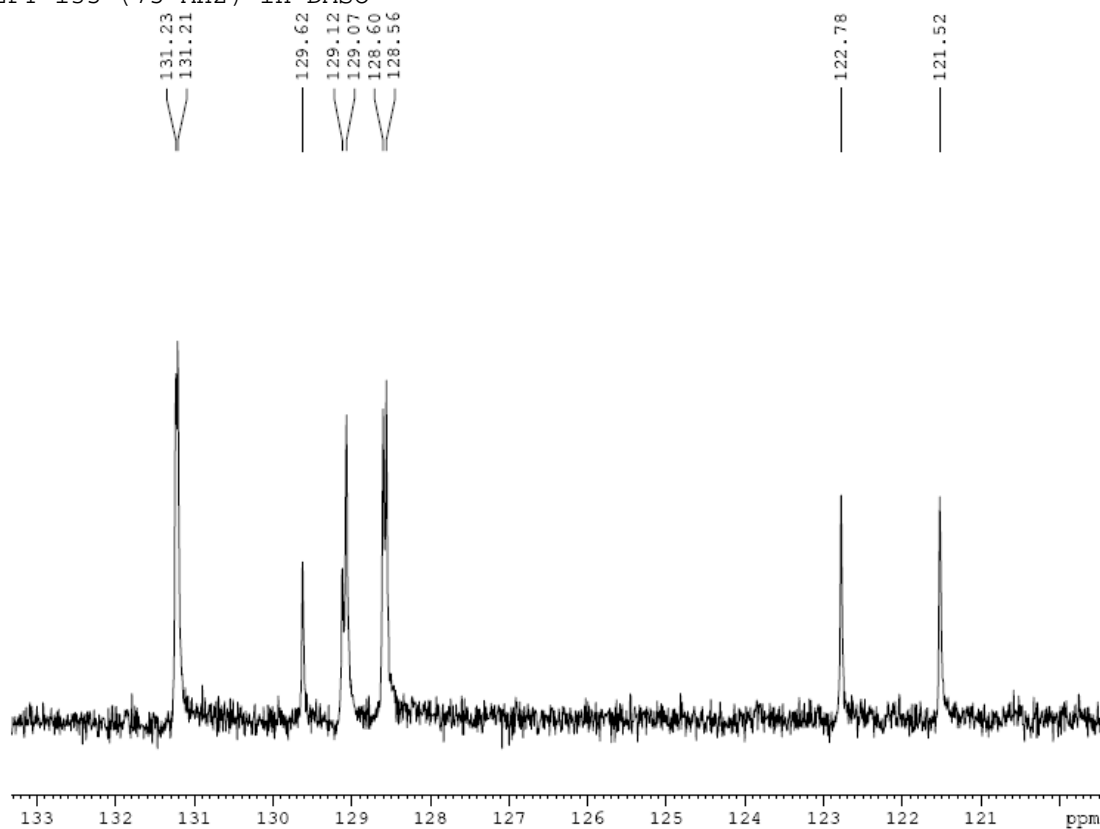

**Figure S11.** Aromatic region of DEPT-135 spectrum of [Ag(1)]AgBr<sub>2</sub> (DMSO, 75 MHz)

$^1\text{H}$  NMR (300 MHz) in DMSO

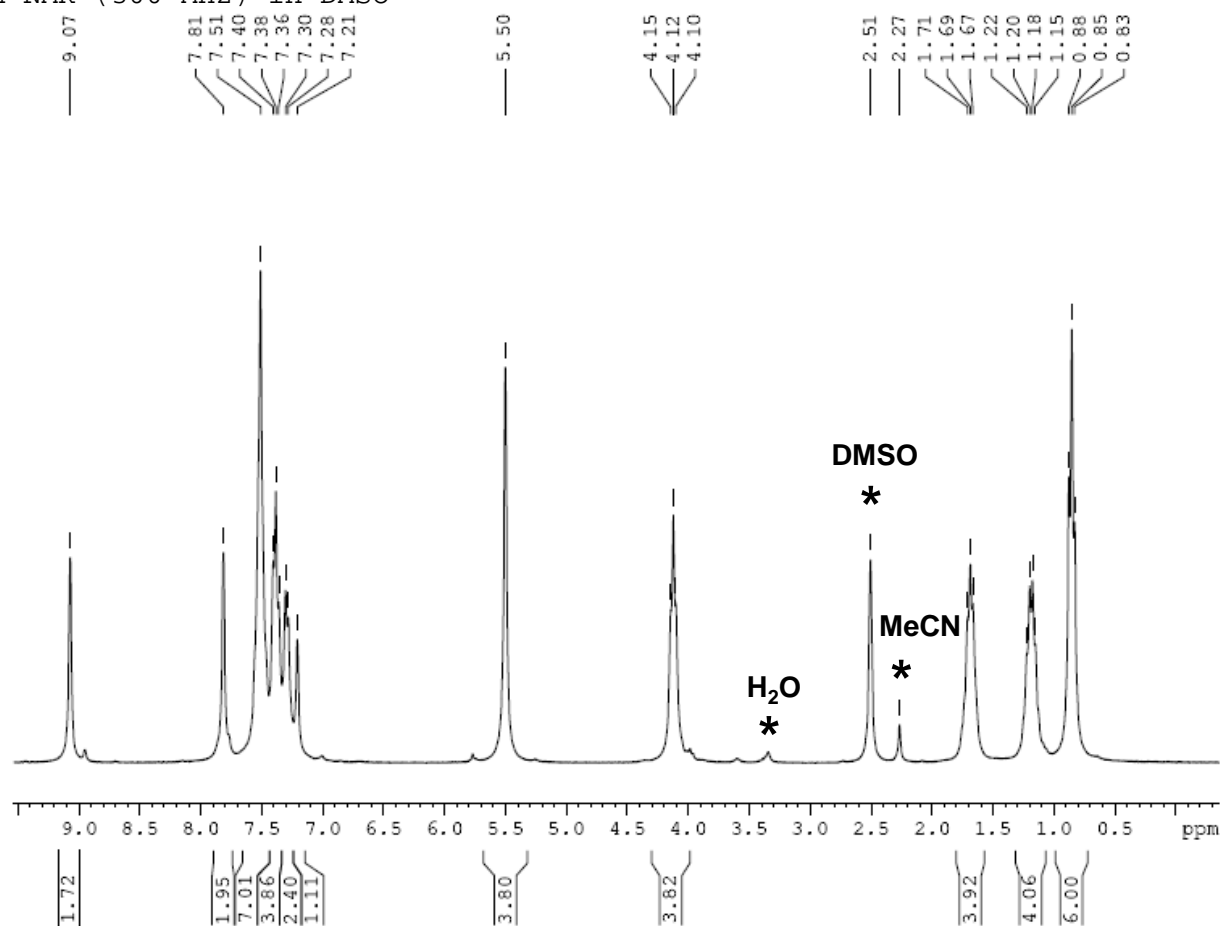

**Figure S12.** Proton NMR spectrum of  $[\text{H}_{21}]\text{Br}_2$  (DMSO, 300 MHz)

$^1\text{H}$  NMR (300 MHz) in DMSO

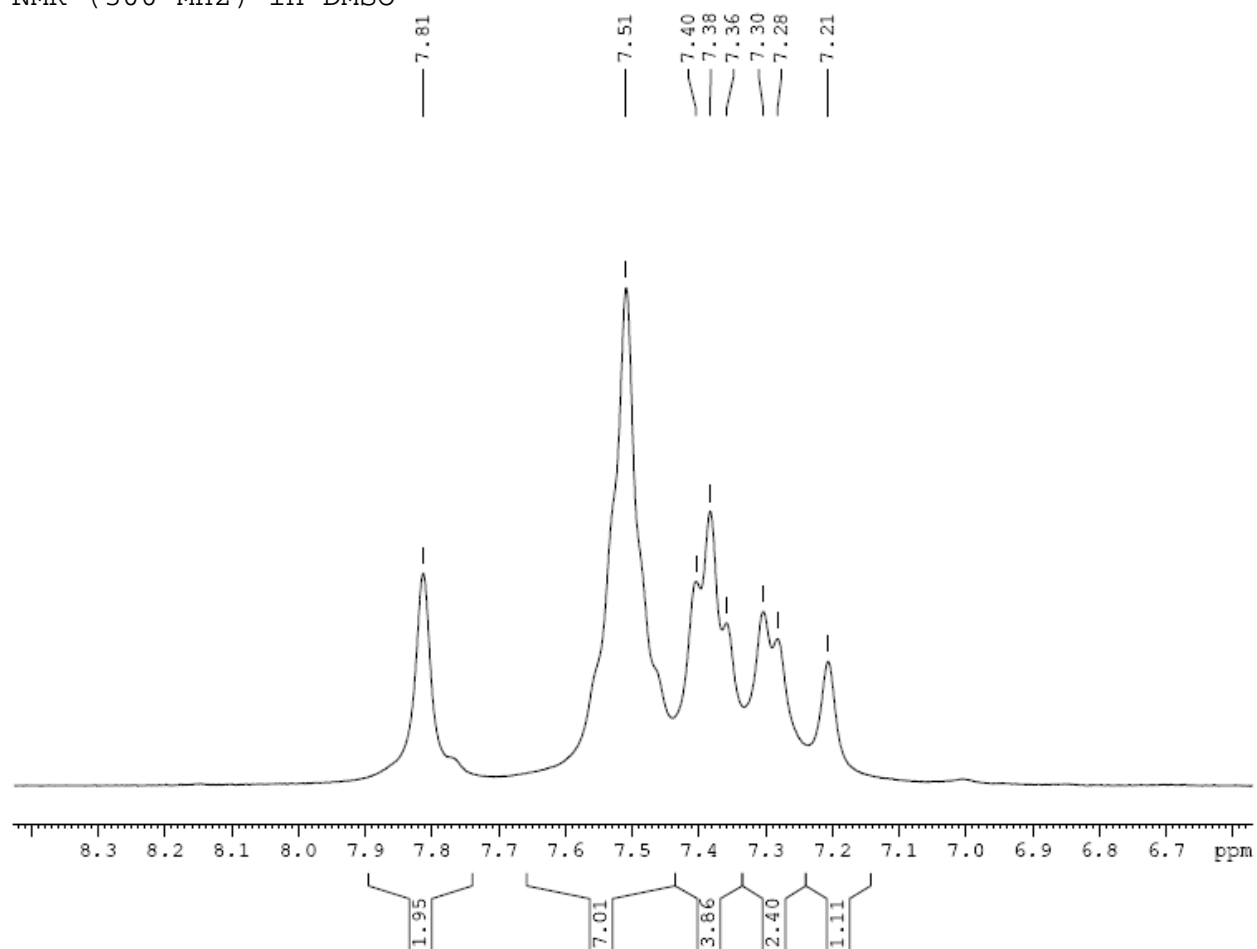

**Figure S13.** Aromatic Region of the  $^1\text{H}$  NMR spectrum of  $[\text{H}_2\mathbf{1}]\text{Br}_2$  (DMSO , 300 MHz)

$^{13}\text{C}$  NMR (75 MHz) in  $\text{CD}_3\text{CN}$

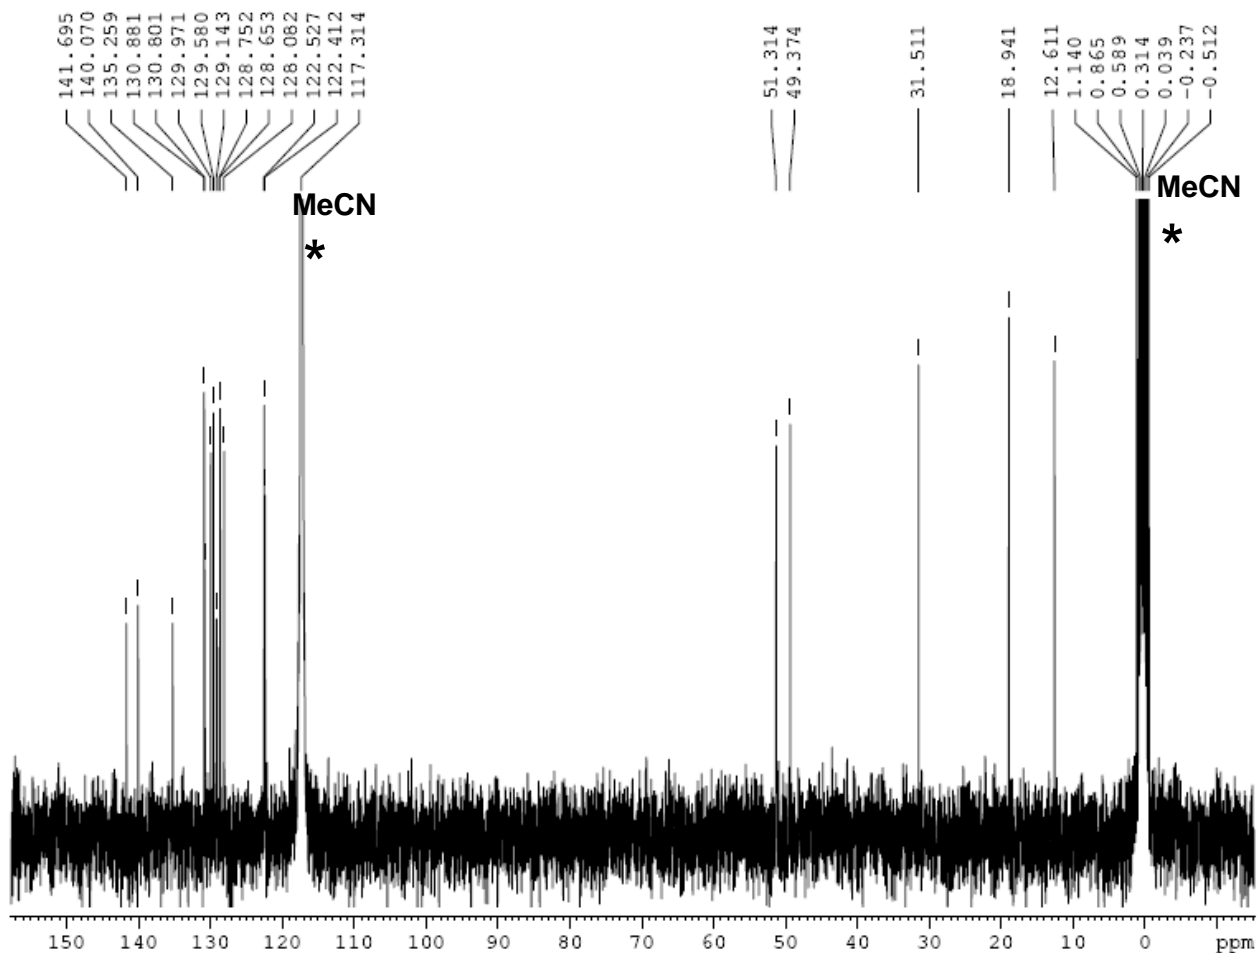

**Figure S14.**  $^{13}\text{C}$  NMR spectrum of  $[\text{H}_2\text{1}]\text{Br}_2$  ( $\text{CD}_3\text{CN}$ , 75 MHz)

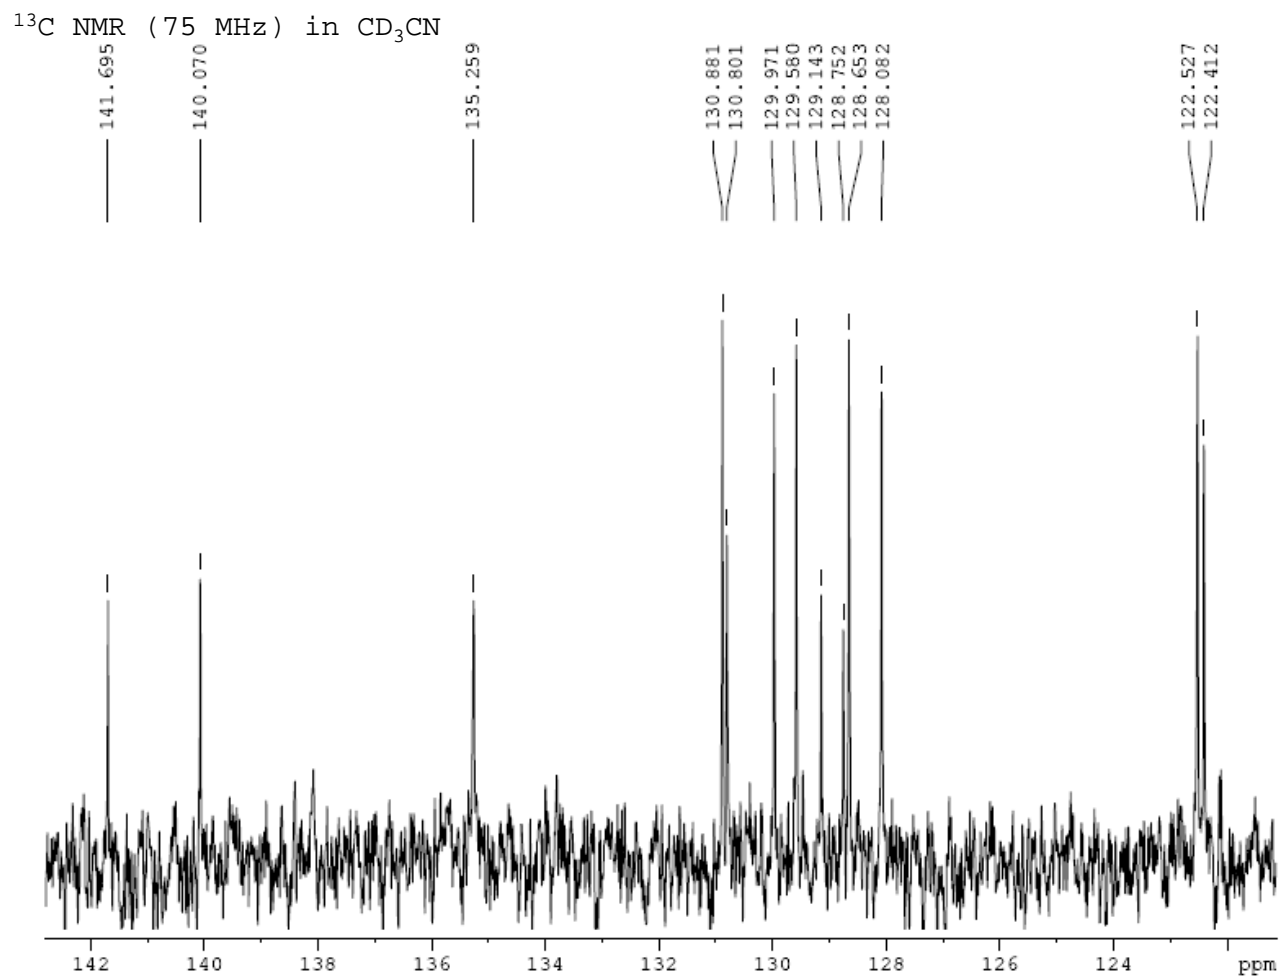

**Figure S15.** Aromatic region of the  $^{13}\text{C}$  NMR spectrum of  $[\text{H}_2\mathbf{1}]\text{Br}_2$  ( $\text{CD}_3\text{CN}$ , 75 MHz)

$^1\text{H}$  NMR (300 MHz) in  $\text{CDCl}_3$

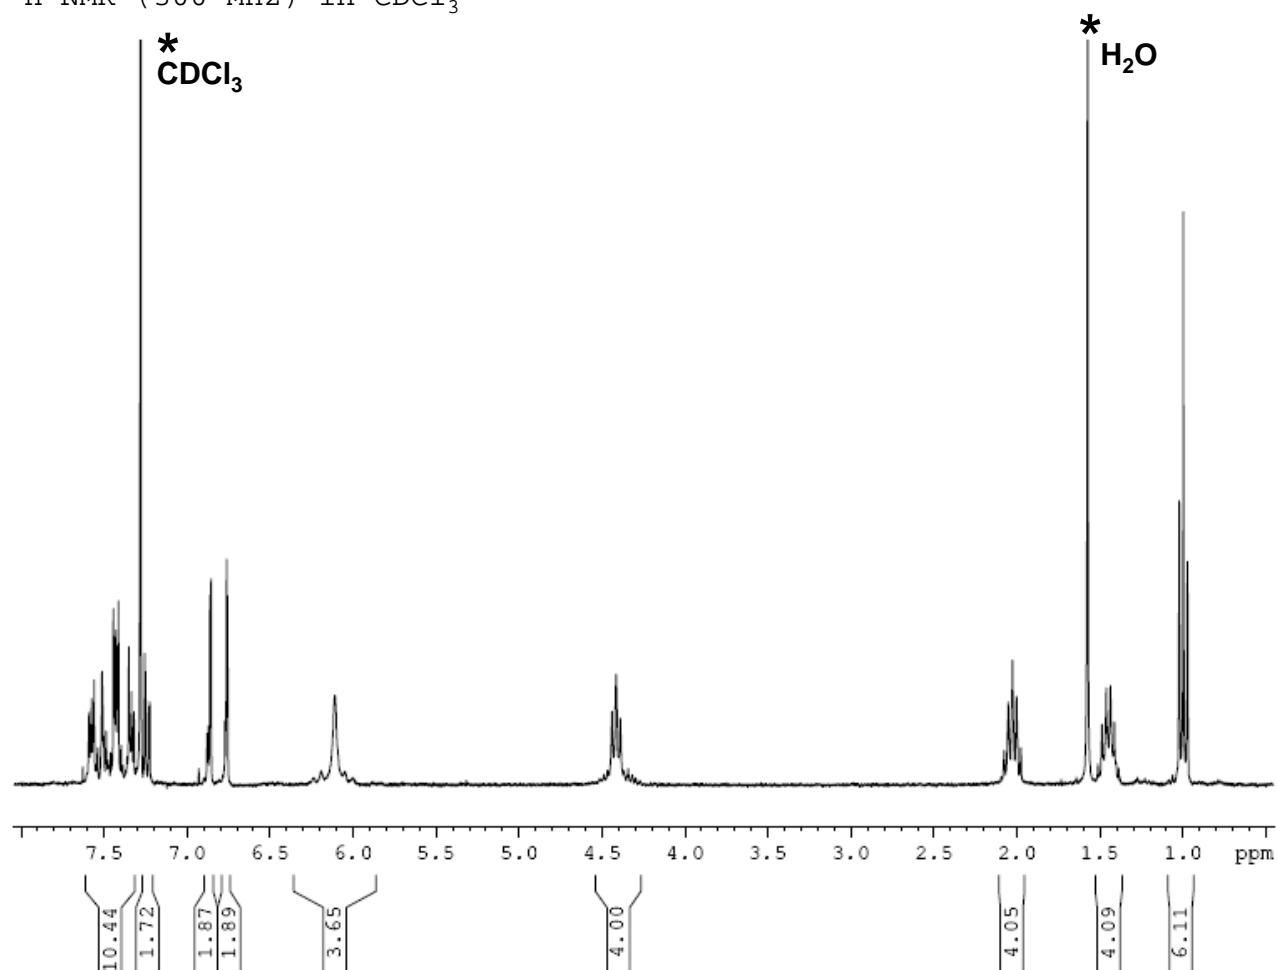

**Figure S16.**  $^1\text{H}$  NMR spectrum of  $[\text{Cl}_2\text{Pd}(\mathbf{1})]$  ( $\text{CDCl}_3$ , 300 MHz)

$^1\text{H}$  NMR (300 MHz) in  $\text{CDCl}_3$

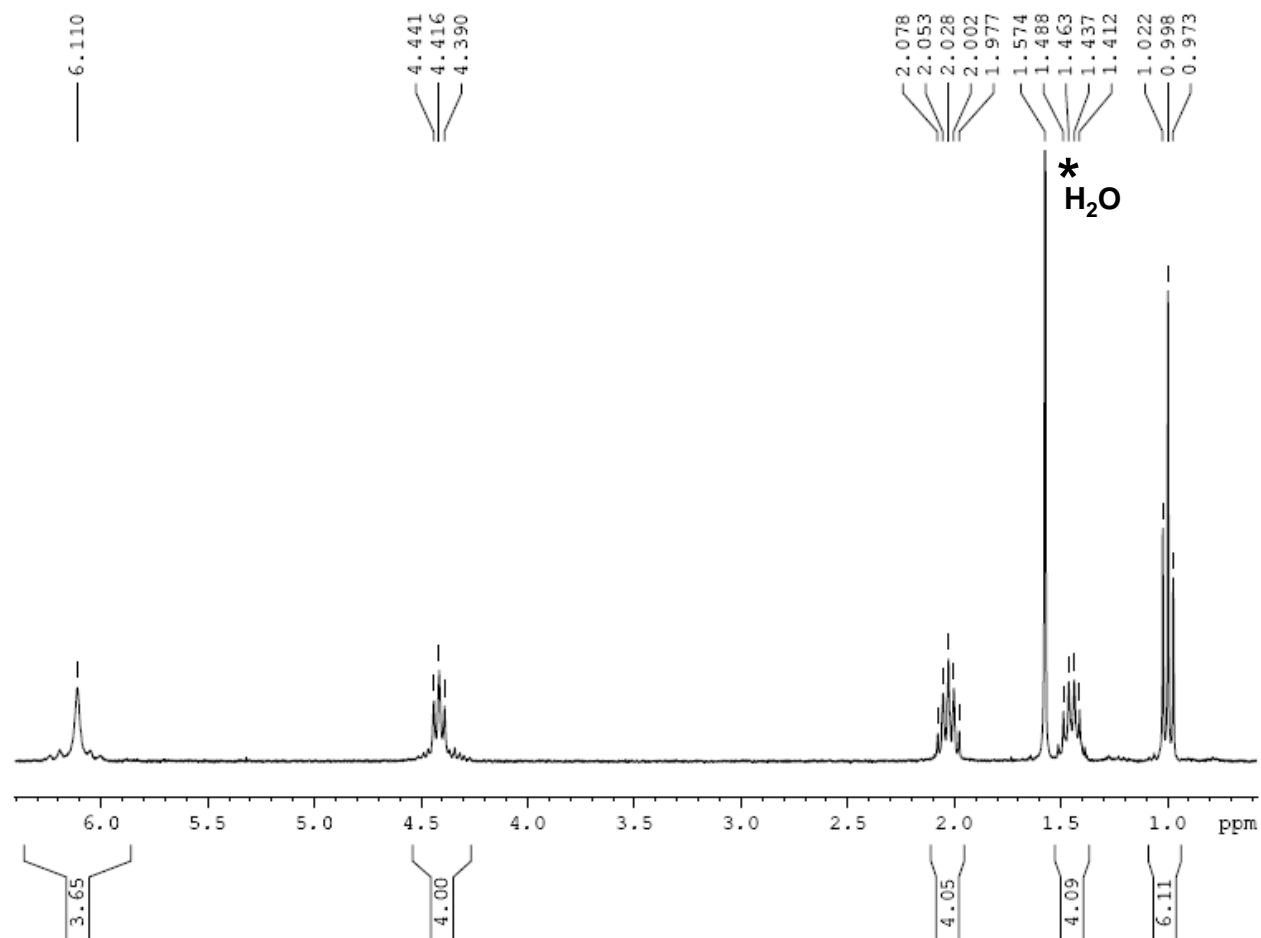

**Figure S17.** Aliphatic region of the  $^1\text{H}$  NMR spectrum of  $[\text{Cl}_2\text{Pd}(\mathbf{1})]$  ( $\text{CDCl}_3$ , 300 MHz)

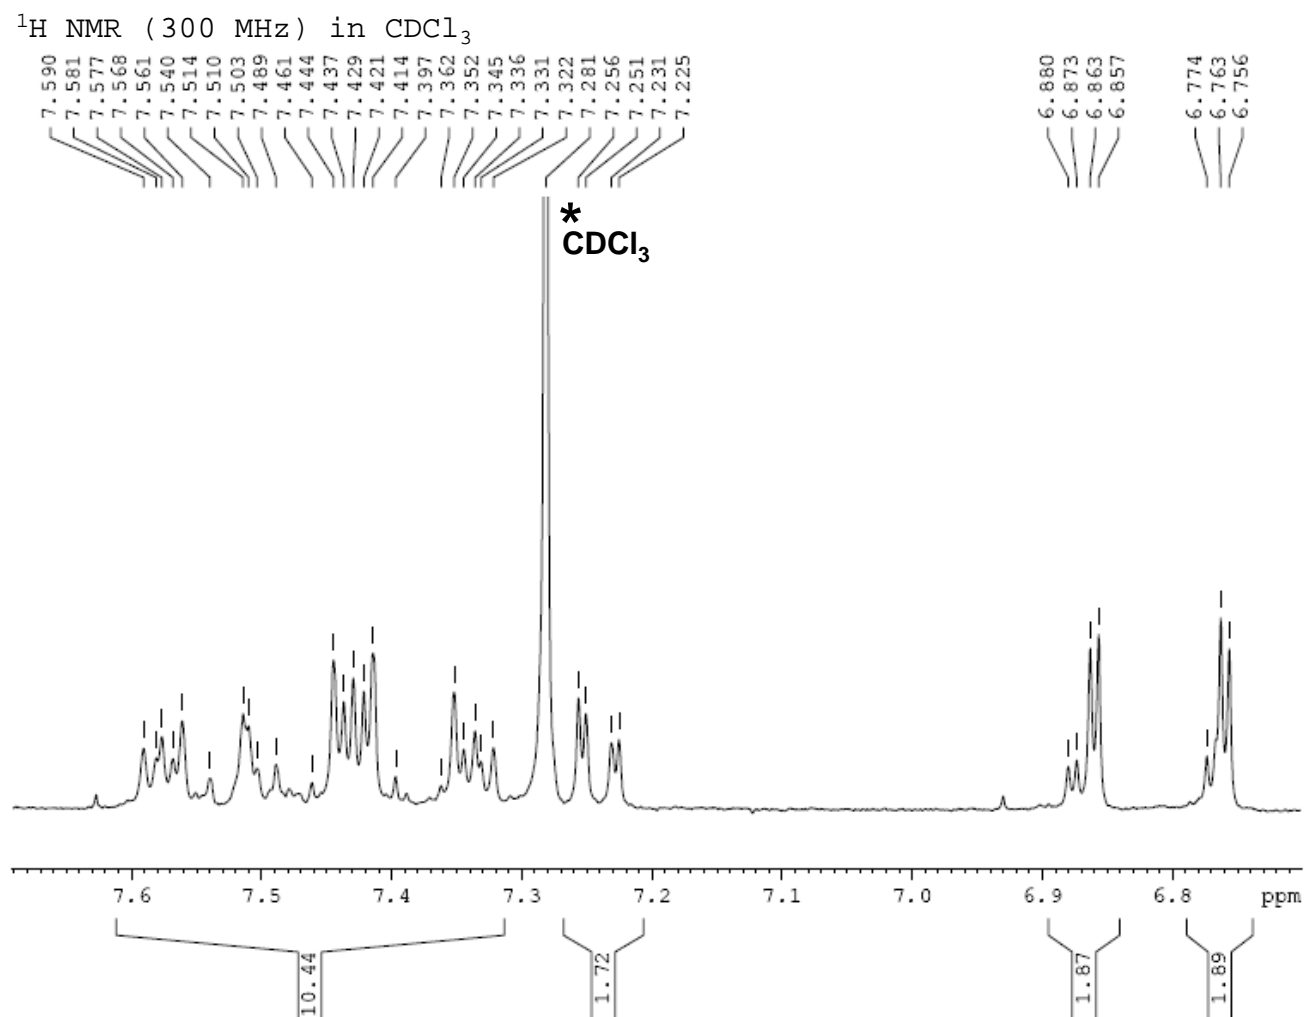

**Figure S18.** Aromatic region of the  $^1\text{H}$  NMR spectrum of  $[\text{Cl}_2\text{Pd}(\mathbf{1})]$  ( $\text{CDCl}_3$ , 300 MHz)

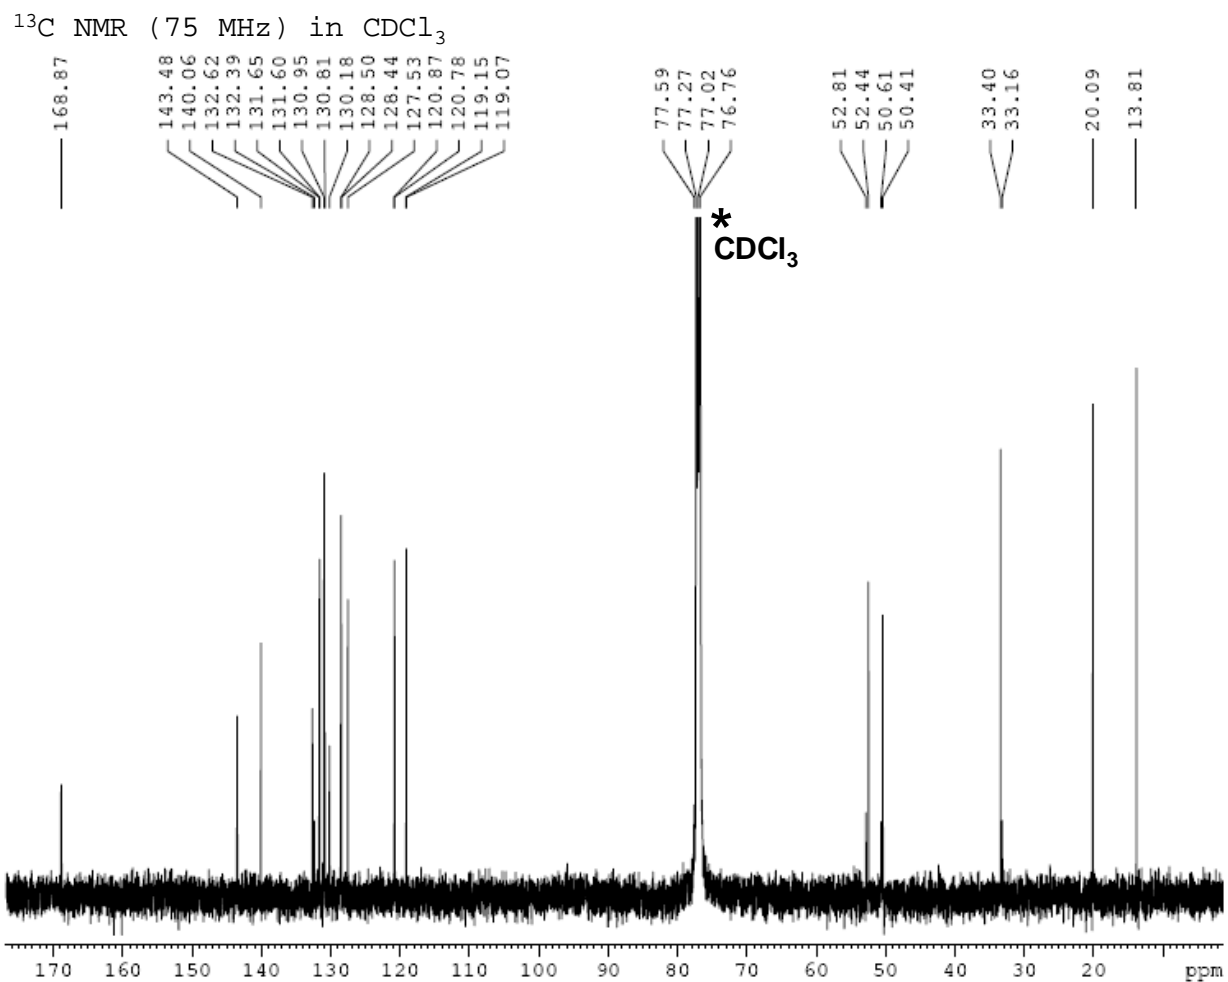

**Figure S19.**  $^{13}\text{C}$  NMR spectrum of  $[\text{Cl}_2\text{Pd}(\mathbf{1})]$  ( $\text{CDCl}_3$ , 75 MHz)

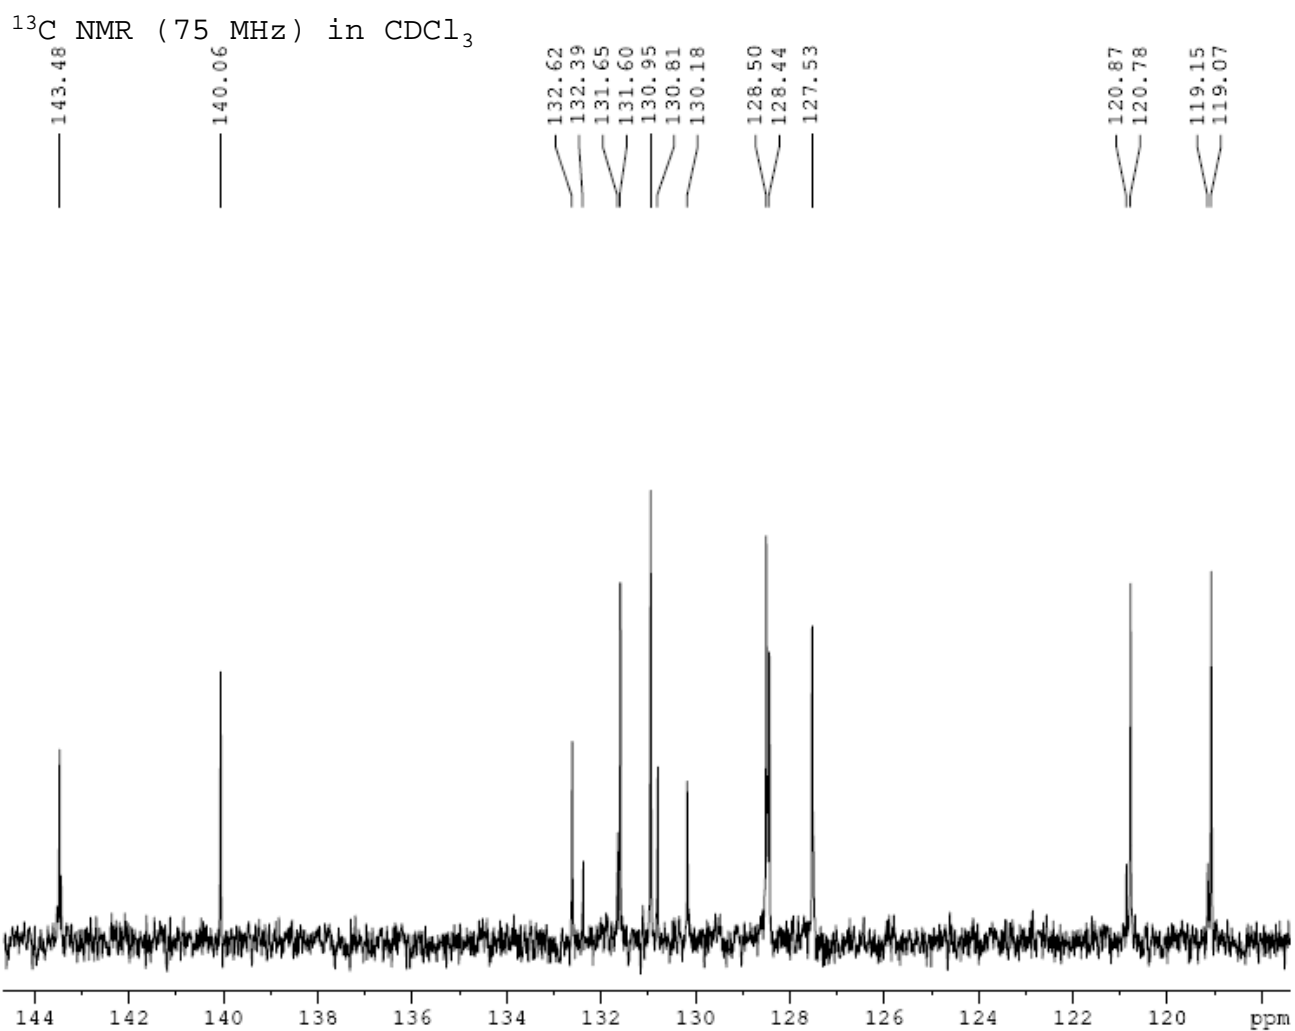

**Figure S20.** Aromatic region of the  $^{13}\text{C}$  NMR spectrum of  $[\text{Cl}_2\text{Pd}(\mathbf{1})]$  ( $\text{CDCl}_3$ , 75 MHz)

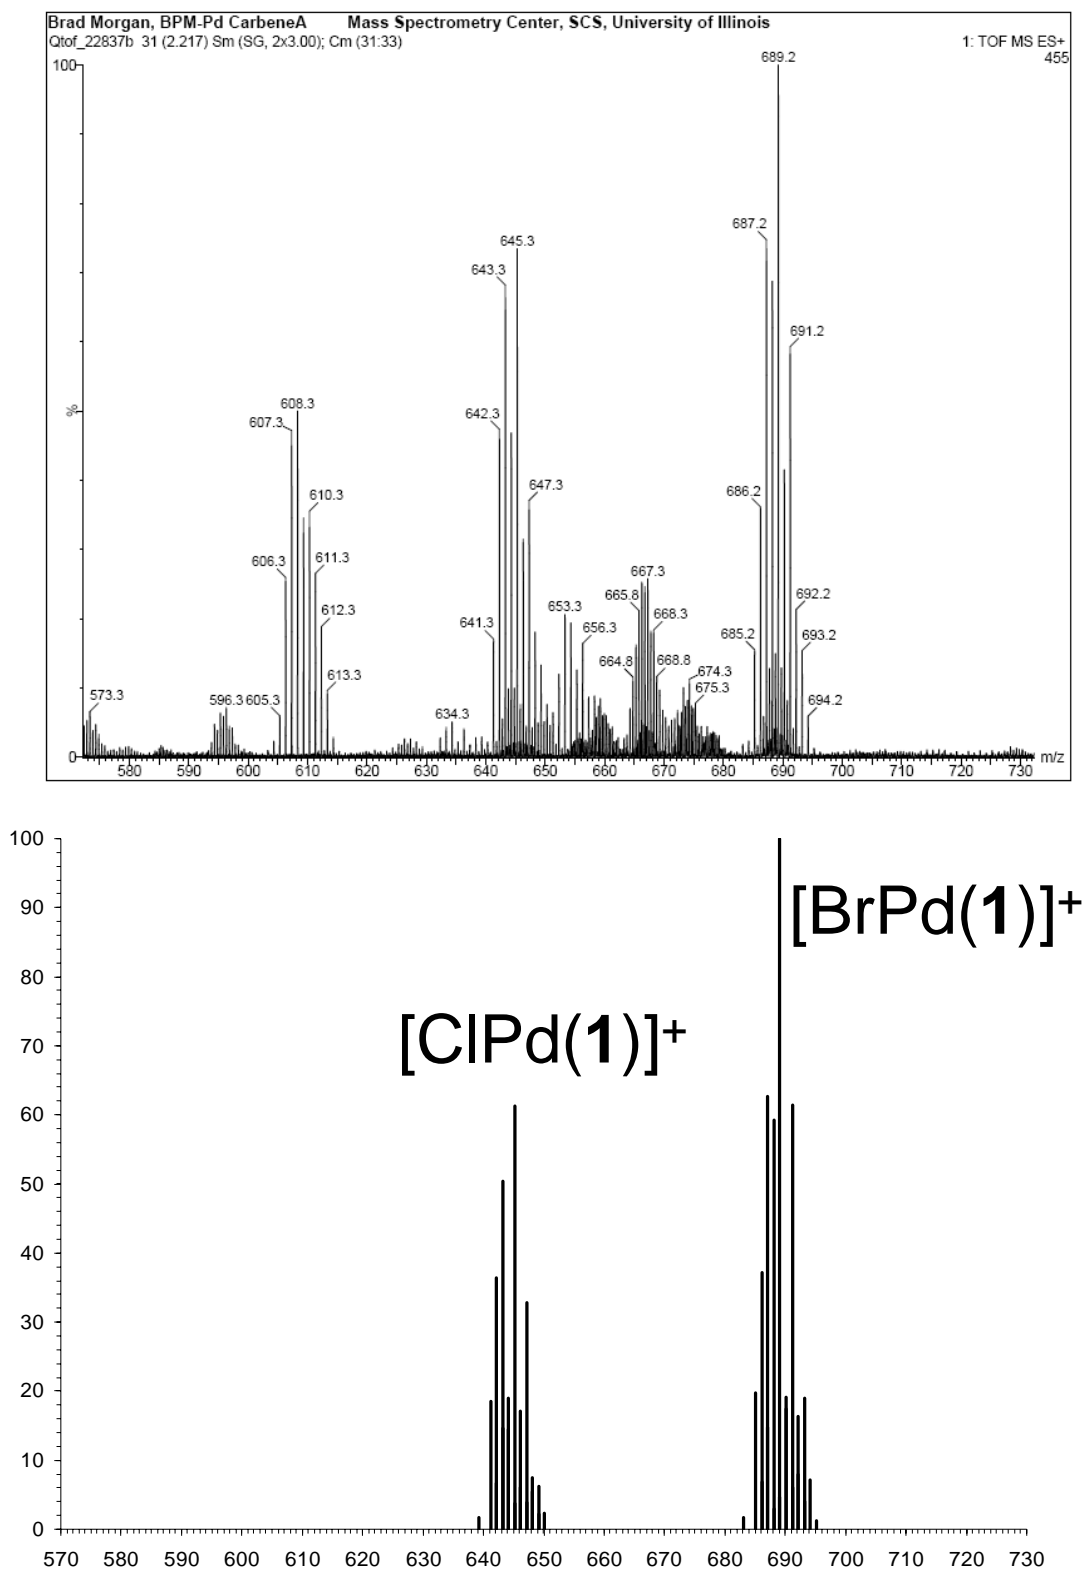

**Figure S21.** ESI-MS of  $[\text{Cl}_2\text{Pd}(\mathbf{1})]$  (top) with theoretical isotopic distributions (bottom) for major peak sets
